# Supplementary material for: Seasonality of diet costs reveals food system performance in East Africa
Source: PubMed Central journal article supplement (PMC7821891; doi:10.1126/sciadv.abc2162), 2020-12-04
Supplement: abc2162_SM.pdf [file abc2162_SM.pdf]

## Supplementary Materials for

### **Seasonality of diet costs reveals food system performance in East Africa**

Yan Bai, Elena N. Naumova, William A. Masters\*

\*Corresponding author: Email: [william.masters@tufts.edu](mailto:william.masters@tufts.edu)

Published 4 December 2020, *Sci. Adv.* **6**, eabc2162 (2020)  
DOI: [10.1126/sciadv.abc2162](https://doi.org/10.1126/sciadv.abc2162)

#### **This PDF file includes:**

Figs. S1 to S4  
Tables S1 to S7

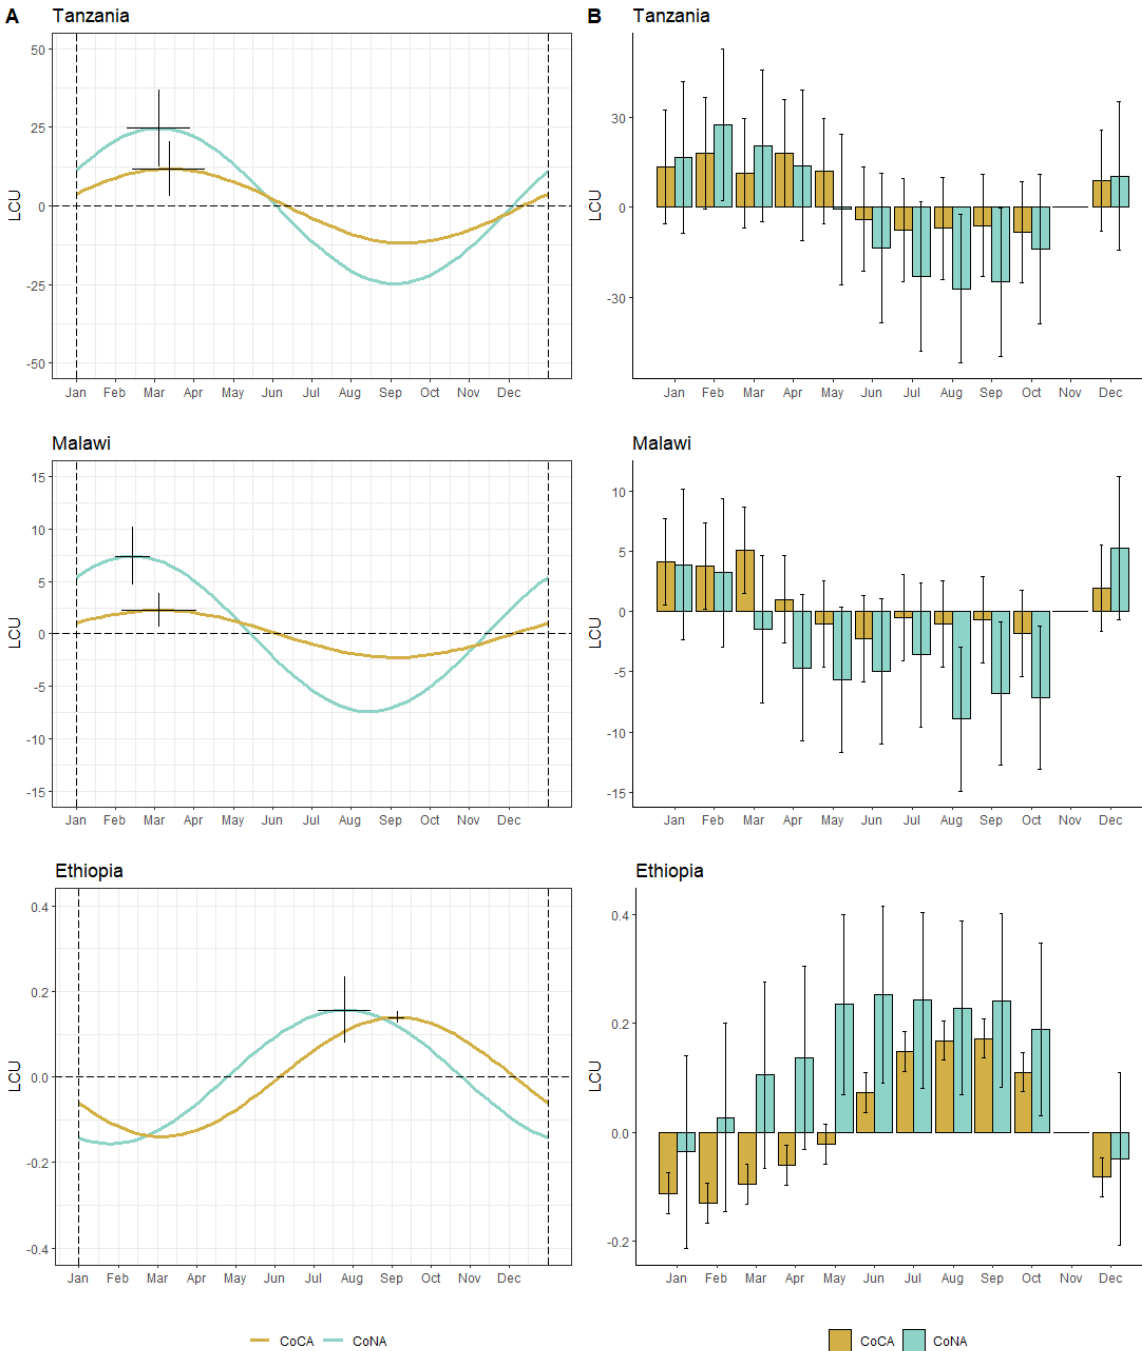

**Fig. S1. Seasonality in diet costs for nutrient adequacy (CoNA) and caloric adequacy (CoCA): comparison between harmonic models and monthly indicators (LCU/day).**

(A) displays estimated harmonic seasonality over a one-year cycle, with error bars showing 95% confidence intervals around the magnitude of seasonal intensity along the vertical axis and peak month along the horizontal axis. (B) shows seasonal variation as differences by calendar month, using November as the base period for end of the dry season in Tanzania and Malawi, and end of rainy season in Ethiopia, with error bars showing 95% confidence intervals around monthly differences in LCU/day.

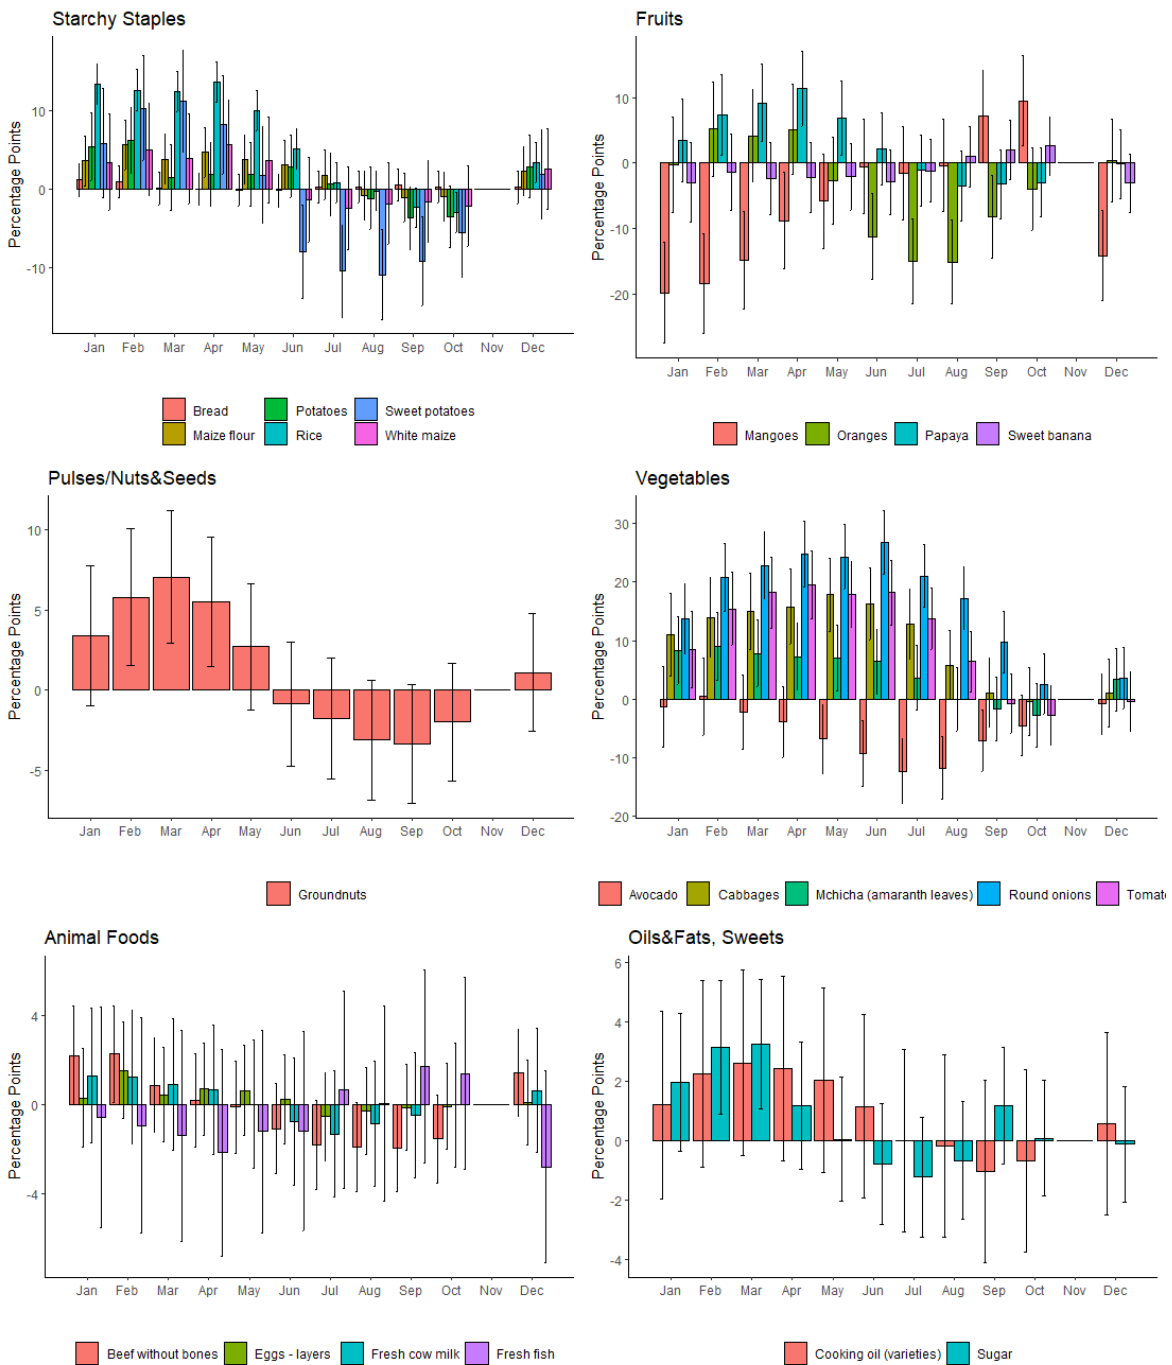

**Fig. S2. Seasonality in retail prices of common food items in Tanzania.** Data shown are percent differences by calendar month for selected items in each food group, relative to its price in November. Error bars show 95% confidence intervals.

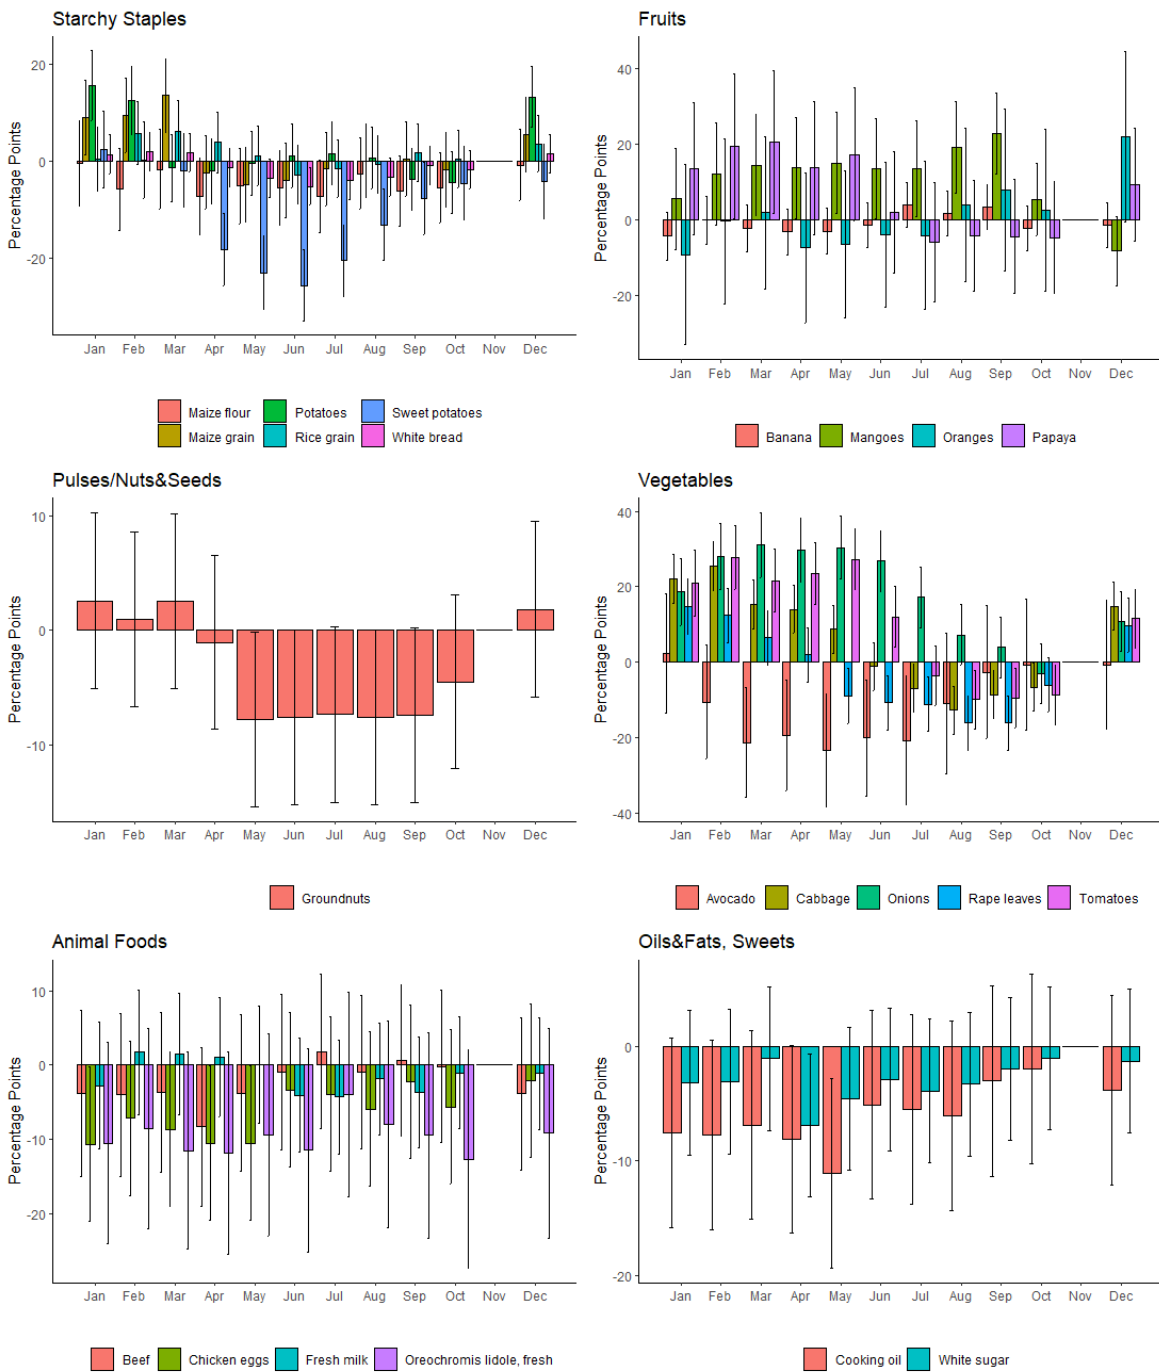

**Fig. S3. Seasonality in retail prices of common food items in Malawi.** Data shown are percent differences by calendar month for selected items in each food group, relative to its price in November. Error bars show 95% confidence intervals.

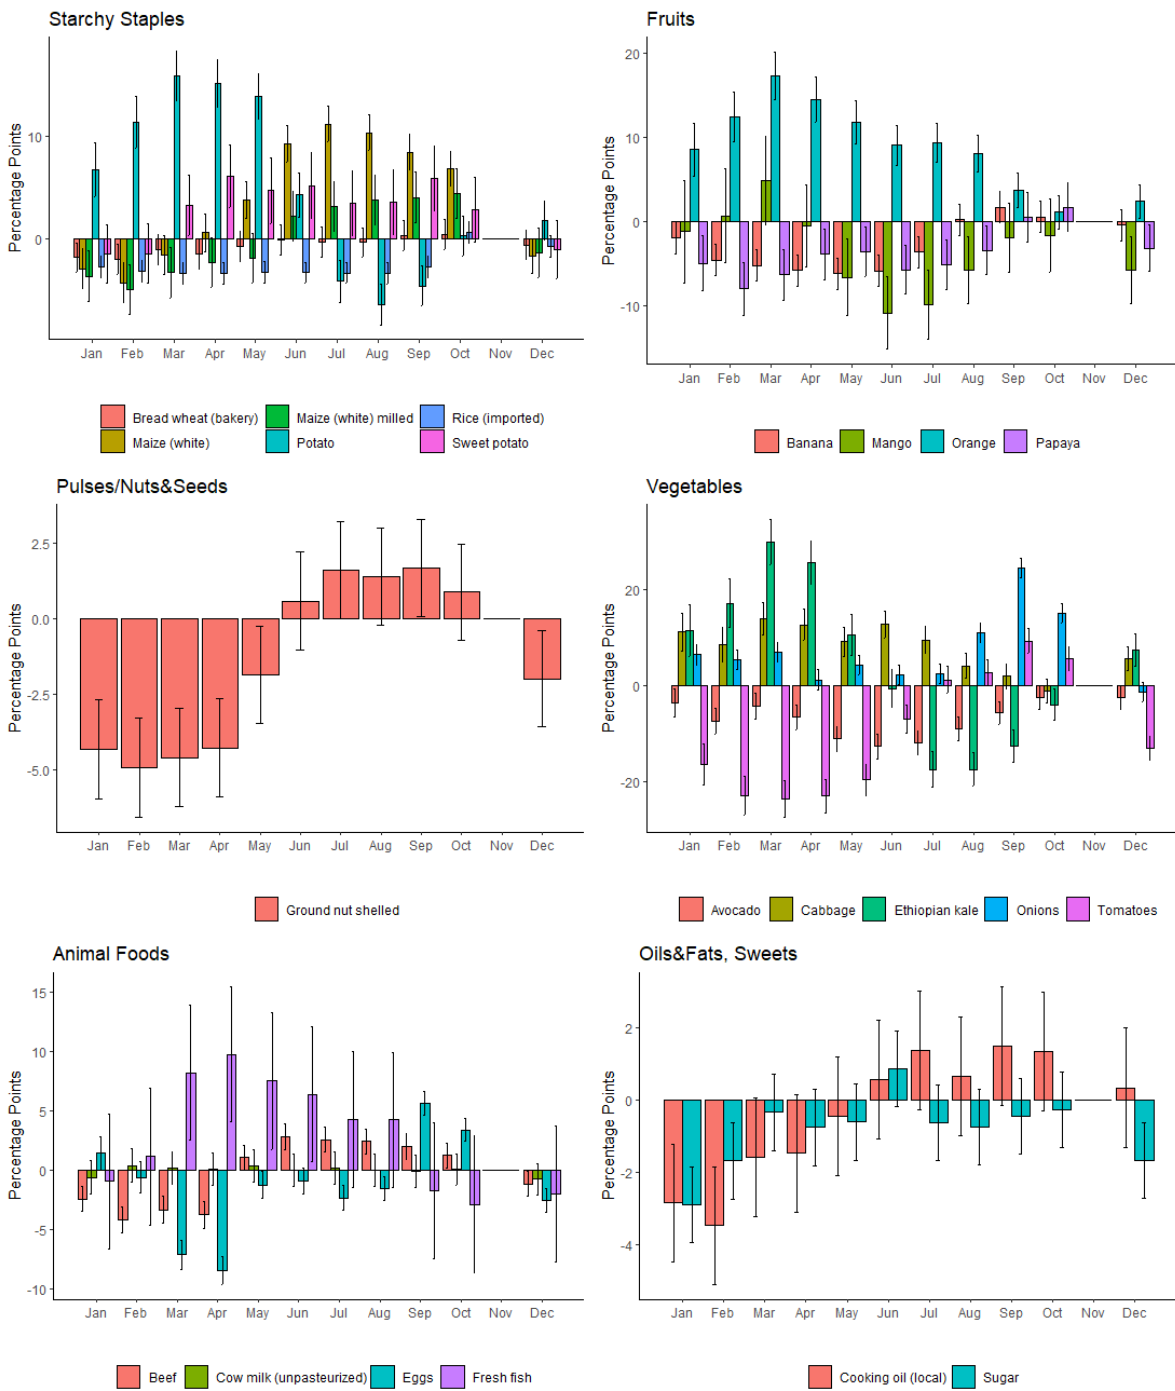

**Fig. S4. Seasonality in retail prices of common food items in Ethiopia.** Data shown are percent differences by calendar month for selected items in each food group, relative to its price in November. Error bars show 95% confidence intervals.

**Table S1. Descriptive statistics and seasonality for monthly prices of all foods in Tanzania between 2011-2015**

| Food Groups            | No           | Food Items                 | Food Prices (LCU per 100kcal) |        |       |     | Peak Time |        |       | Seasonal Intensity |        |       |
|------------------------|--------------|----------------------------|-------------------------------|--------|-------|-----|-----------|--------|-------|--------------------|--------|-------|
|                        |              |                            | Obs.                          | Mean   | SD    | CV  | Estimate  | 95% CI |       | Estimate           | 95% CI |       |
| Starchy Staples        | 1            | Biscuit                    | 1,236                         | 105.4  | 100.5 | 1.0 | 8.6       | 1.4    | 15.8  | 1.3%               | (5.0%) | 8.1%  |
|                        | 2            | Bread                      | 1,236                         | 82.3   | 23.0  | 0.3 | 0.5       | (3.3)  | 4.3   | 0.7%               | (1.1%) | 2.5%  |
|                        | 3            | Bun                        | 1,236                         | 64.0   | 23.0  | 0.4 | 4.4       | 0.4    | 8.4   | 2.7%               | (1.2%) | 6.7%  |
|                        | 4            | Cassava flour              | 1,063                         | 44.3   | 20.3  | 0.5 | 10.4      | 6.9    | 13.9  | 2.5%               | (0.5%) | 5.6%  |
|                        | 5            | Cassava fresh              | 1,236                         | 45.6   | 16.2  | 0.4 | 1.1       | 0.3    | 1.8   | 10.1%              | 4.5%   | 16.0% |
|                        | 6            | Cooking bananas            | 1,236                         | 97.3   | 43.2  | 0.4 | 11.6      | 5.6    | 17.6  | 2.2%               | (2.3%) | 6.9%  |
|                        | 7            | Finger millet              | 1,236                         | 46.8   | 13.3  | 0.3 | 4.8       | (0.0)  | 9.7   | 1.6%               | (1.0%) | 4.3%  |
|                        | 8            | Maize flour                | 1,236                         | 27.8   | 5.2   | 0.2 | 3.0       | 2.1    | 3.9   | 6.0%               | 3.5%   | 8.5%  |
|                        | 9            | Pastry                     | 1,236                         | 73.2   | 19.9  | 0.3 | 4.9       | 1.7    | 8.1   | 2.6%               | (0.3%) | 5.5%  |
|                        | 10           | Potatoes                   | 1,236                         | 177.4  | 49.2  | 0.3 | 2.2       | 1.4    | 3.0   | 9.6%               | 5.3%   | 14.0% |
|                        | 11           | Rice                       | 1,236                         | 44.4   | 8.4   | 0.2 | 3.0       | 2.8    | 3.2   | 17.6%              | 15.0%  | 20.3% |
|                        | 12           | Spaghetti                  | 1,236                         | 37.5   | 3.8   | 0.1 | 11.8      | 9.4    | 14.1  | 0.9%               | (0.2%) | 1.9%  |
|                        | 13           | Sweet potatoes             | 1,232                         | 84.6   | 29.2  | 0.4 | 2.4       | 1.9    | 2.9   | 21.2%              | 13.4%  | 29.4% |
|                        | 14           | Wheat flour                | 1,236                         | 36.4   | 3.7   | 0.1 | 2.5       | 1.6    | 3.3   | 2.7%               | 1.0%   | 4.4%  |
|                        | 15           | White maize                | 1,236                         | 18.3   | 6.1   | 0.3 | 2.5       | 1.4    | 3.6   | 6.5%               | 0.7%   | 12.6% |
| Pulses, Nuts and Seeds | 16           | Beans (soya)               | 1,236                         | 41.6   | 7.4   | 0.2 | 2.5       | 2.1    | 3.0   | 9.5%               | 6.3%   | 12.8% |
|                        | 17           | Lentils                    | 1,235                         | 72.7   | 21.1  | 0.3 | 3.4       | 2.5    | 4.3   | 8.0%               | 4.3%   | 11.9% |
|                        | 18           | Natural groundnuts         | 1,236                         | 38.8   | 7.0   | 0.2 | 2.8       | 2.0    | 3.7   | 8.8%               | 4.2%   | 13.5% |
|                        | 19           | Red dry beans              | 1,236                         | 47.0   | 8.7   | 0.2 | 3.0       | 2.1    | 3.8   | 6.7%               | 3.9%   | 9.6%  |
| Animal Foods           | 20           | Beef Sausage               | 1,236                         | 280.7  | 46.5  | 0.2 | 1.9       | (1.1)  | 4.9   | 0.8%               | (1.1%) | 2.7%  |
|                        | 21           | Beef with bones            | 1,236                         | 555.1  | 94.0  | 0.2 | 1.3       | 0.8    | 1.8   | 6.3%               | 4.4%   | 8.3%  |
|                        | 22           | Beef without bones         | 1,236                         | 299.2  | 50.8  | 0.2 | 1.7       | 1.2    | 2.2   | 5.2%               | 3.1%   | 7.3%  |
|                        | 23           | Dried fish                 | 1,137                         | 666.4  | 325.3 | 0.5 | 0.5       | (0.9)  | 1.9   | 8.0%               | (3.6%) | 21.1% |
|                        | 24           | Dried sardines             | 1,236                         | 255.4  | 138.9 | 0.5 | 3.3       | 2.0    | 4.5   | 6.3%               | 3.3%   | 9.3%  |
|                        | 25           | Eggs - layers              | 1,188                         | 478.2  | 66.0  | 0.1 | 2.7       | 0.6    | 4.8   | 1.3%               | (0.6%) | 3.3%  |
|                        | 26           | Eggs - traditional         | 1,236                         | 649.4  | 164.8 | 0.3 | 5.6       | (3.0)  | 14.1  | 0.6%               | (1.7%) | 2.9%  |
|                        | 27           | Fresh cow milk             | 1,236                         | 174.8  | 39.2  | 0.2 | 1.6       | 0.1    | 3.1   | 2.3%               | (0.5%) | 5.1%  |
|                        | 28           | Fresh fish                 | 1,236                         | 1226.5 | 379.0 | 0.3 | 9.1       | 6.9    | 11.3  | 3.0%               | (1.0%) | 7.3%  |
|                        | 29           | Fried fish                 | 1,193                         | 874.6  | 341.2 | 0.4 | 1.1       | (1.9)  | 4.0   | 2.7%               | (3.0%) | 8.8%  |
|                        | 30           | Goat meat                  | 1,231                         | 229.9  | 47.3  | 0.2 | 1.1       | 0.0    | 2.2   | 2.4%               | 0.6%   | 4.3%  |
|                        | 31           | Industrially bred chicken  | 981                           | 523.7  | 108.1 | 0.2 | 0.8       | (5.9)  | 7.4   | 0.5%               | (1.9%) | 2.9%  |
|                        | 32           | Pork meat                  | 1,234                         | 132.9  | 30.5  | 0.2 | 1.0       | (0.3)  | 2.3   | 2.0%               | 0.1%   | 4.1%  |
|                        | 33           | Powdered milk              | 1,236                         | 474.6  | 68.3  | 0.1 | 1.2       | (3.0)  | 5.4   | 0.6%               | (1.2%) | 2.5%  |
|                        | 34           | Traditionally bred chicken | 1,236                         | 755.3  | 194.1 | 0.3 | 0.2       | (1.1)  | 1.4   | 3.4%               | 1.0%   | 5.8%  |
| Fruits and Vegetables  | 35           | Apples (imported)          | 1,216                         | 1187.3 | 308.0 | 0.3 | 3.7       | 1.4    | 6.0   | 5.4%               | (0.9%) | 12.2% |
|                        | 36           | Avocado                    | 1,236                         | 112.8  | 51.4  | 0.5 | 1.1       | (0.0)  | 2.3   | 12.3%              | 4.9%   | 20.2% |
|                        | 37           | Bitter tomatoes            | 1,236                         | 598.4  | 270.5 | 0.5 | 2.4       | 0.4    | 4.3   | 4.0%               | (1.6%) | 10.1% |
|                        | 38           | Cabbages                   | 1,236                         | 302.7  | 166.1 | 0.6 | 4.0       | 3.4    | 4.7   | 20.9%              | 14.1%  | 28.1% |
|                        | 39           | Carrots                    | 1,236                         | 418.9  | 222.1 | 0.5 | 4.9       | 3.9    | 6.0   | 11.9%              | 6.8%   | 17.3% |
|                        | 40           | Coconut mature             | 1,236                         | 757.7  | 290.1 | 0.4 | 11.5      | 10.7   | 12.4  | 11.3%              | 6.5%   | 16.2% |
|                        | 41           | Egg plant                  | 1,236                         | 583.5  | 249.9 | 0.4 | 5.9       | (1.5)  | 13.2  | 1.7%               | (4.1%) | 7.9%  |
|                        | 42           | Green bell pepper          | 1,236                         | 1575.8 | 606.7 | 0.4 | 4.4       | 2.8    | 5.9   | 8.8%               | 3.0%   | 15.0% |
|                        | 43           | Green peas                 | 1,236                         | 808.6  | 283.0 | 0.4 | 3.6       | 2.0    | 5.1   | 9.1%               | 3.6%   | 14.9% |
|                        | 44           | Green pepper (hot)         | 1,236                         | 1029.4 | 419.8 | 0.4 | 9.3       | 7.4    | 11.3  | 7.0%               | 1.7%   | 12.6% |
|                        | 45           | Ladies finger (okra)       | 1,236                         | 713.9  | 255.6 | 0.4 | 11.8      | 7.8    | 15.9  | 2.7%               | (3.2%) | 9.1%  |
|                        | 46           | Lemons                     | 1,236                         | 695.8  | 333.7 | 0.5 | 1.7       | 1.2    | 2.2   | 35.9%              | 24.6%  | 48.3% |
|                        | 47           | Limes                      | 1,024                         | 1120.6 | 709.7 | 0.6 | 0.7       | (0.2)  | 1.6   | 21.1%              | 9.6%   | 33.7% |
|                        | 48           | Mangoes                    | 1,226                         | 247.1  | 106.9 | 0.4 | 8.2       | 7.8    | 8.7   | 29.7%              | 19.5%  | 40.8% |
|                        | 49           | Mchicha (amaranth leaves)  | 1,236                         | 342.8  | 166.0 | 0.5 | 3.1       | 2.2    | 3.9   | 12.8%              | 7.5%   | 18.4% |
|                        | 50           | Oranges                    | 1,230                         | 257.7  | 89.1  | 0.4 | 2.0       | 1.2    | 2.8   | 15.1%              | 6.7%   | 24.2% |
|                        | 51           | Papaya                     | 1,236                         | 370.9  | 133.9 | 0.4 | 3.6       | 2.6    | 4.7   | 13.4%              | 7.1%   | 20.1% |
| 52                     | Pineapples   | 1,236                      | 411.3                         | 137.1  | 0.3   | 8.6 | 8.0       | 9.1    | 20.9% | 13.5%              | 28.7%  |       |
| 53                     | Round onions | 1,236                      | 382.1                         | 115.0  | 0.3   | 4.9 | 4.4       | 5.4    | 26.7% | 20.2%              | 33.6%  |       |
| 54                     | Sweet banana | 1,236                      | 199.6                         | 80.0   | 0.4   | 8.8 | 7.4       | 10.3   | 6.3%  | 0.4%               | 12.6%  |       |
| 55                     | Tomatoes red | 1,236                      | 533.5                         | 201.2  | 0.4   | 4.4 | 3.8       | 4.9    | 25.8% | 18.7%              | 33.3%  |       |
| Oils and Fats          | 56           | Cooking fat                | 1,236                         | 145.1  | 82.8  | 0.6 | 2.3       | 0.4    | 4.2   | 2.4%               | (0.8%) | 5.8%  |
|                        | 57           | Cooking oil                | 1,236                         | 75.4   | 51.0  | 0.7 | 3.2       | 1.8    | 4.7   | 3.4%               | 1.0%   | 5.9%  |
|                        | 58           | Margarine                  | 1,236                         | 99.8   | 25.2  | 0.3 | 4.3       | 0.8    | 7.8   | 1.4%               | (0.3%) | 3.2%  |
| Sweets                 | 59           | Honey                      | 1,236                         | 151.9  | 56.1  | 0.4 | 1.3       | (0.9)  | 3.5   | 1.9%               | (1.4%) | 5.4%  |
|                        | 60           | Mixed fruits jam           | 1,236                         | 278.3  | 52.4  | 0.2 | 1.8       | (1.0)  | 4.6   | 1.0%               | (1.3%) | 3.3%  |
|                        | 61           | Sugar                      | 1,236                         | 51.5   | 5.1   | 0.1 | 2.0       | 0.9    | 3.1   | 2.3%               | 0.4%   | 4.2%  |

Note: Peak time shows as a continuous variable from 0-12, where 0 indicates the start and 12 as the end of a calendar year.

**Table S2. Descriptive statistics and seasonality for monthly prices of all foods in Malawi between 2007 to 2016**

| Food Groups            | No      | Food Items                | Food Prices (LCU per 100kcal) |       |       |     | Peak Time |        |       | Seasonal Intensity |        |       |
|------------------------|---------|---------------------------|-------------------------------|-------|-------|-----|-----------|--------|-------|--------------------|--------|-------|
|                        |         |                           | Obs.                          | Mean  | SD    | CV  | Estimate  | 95% CI |       | Estimate           | 95% CI |       |
| Starchy Staples        | 1       | Biscuits                  | 1,301                         | 12.7  | 6.4   | 0.5 | 2.9       | (0.4)  | 6.2   | 4.1%               | (3.1%) | 11.8% |
|                        | 2       | Cassava                   | 2,522                         | 7.1   | 6.3   | 0.9 | 8.0       | (6.2)  | 22.2  | 0.9%               | (6.6%) | 9.0%  |
|                        | 3       | Maize flour               | 2,791                         | 7.6   | 5.5   | 0.7 | 0.9       | (0.8)  | 2.5   | 6.4%               | (1.1%) | 14.5% |
|                        | 4       | Maize four (whole grain)  | 1,178                         | 9.0   | 4.6   | 0.5 | 11.9      | 10.5   | 13.2  | 10.8%              | 2.4%   | 20.0% |
|                        | 5       | Maize grain               | 3,419                         | 3.0   | 2.6   | 0.9 | 1.6       | 0.6    | 2.6   | 10.7%              | 2.9%   | 19.1% |
|                        | 6       | Maize grain, Admarc       | 3,048                         | 2.2   | 1.7   | 0.8 | 3.4       | 1.4    | 5.3   | 6.4%               | 1.2%   | 11.8% |
|                        | 7       | Mandazi (fried-dough)     | 1,297                         | 17.8  | 16.9  | 1.0 | 11.2      | 9.6    | 12.8  | 13.3%              | 4.0%   | 23.4% |
|                        | 8       | Potatoes                  | 3,380                         | 26.1  | 21.8  | 0.8 | 1.4       | 0.9    | 1.9   | 22.6%              | 14.5%  | 31.2% |
|                        | 9       | Rice grain                | 3,039                         | 8.6   | 5.8   | 0.7 | 3.0       | (1.1)  | 7.0   | 2.4%               | (3.8%) | 9.0%  |
|                        | 10      | Sweet potatoes            | 2,897                         | 12.7  | 10.9  | 0.9 | 11.8      | 11.2   | 12.4  | 25.2%              | 16.2%  | 35.0% |
|                        | 11      | White bread               | 3,340                         | 10.8  | 5.0   | 0.5 | 1.1       | 0.2    | 2.0   | 5.3%               | 1.5%   | 9.2%  |
| Pulses, Nuts and Seeds | 12      | Brown beans               | 3,380                         | 12.8  | 8.4   | 0.7 | 0.6       | (0.2)  | 1.4   | 13.0%              | 6.7%   | 19.7% |
|                        | 13      | Cowpeas                   | 1,025                         | 13.9  | 7.1   | 0.5 | 1.9       | 1.1    | 2.7   | 20.6%              | 8.9%   | 33.5% |
|                        | 14      | Groundnuts                | 3,030                         | 8.4   | 6.1   | 0.7 | 1.2       | (0.1)  | 2.4   | 9.0%               | 1.1%   | 17.5% |
|                        | 15      | Pigeon peas               | 730                           | 15.1  | 7.9   | 0.5 | 1.9       | (0.3)  | 4.2   | 6.5%               | (4.5%) | 18.6% |
|                        | 16      | White beans               | 3,033                         | 11.6  | 7.5   | 0.6 | 1.1       | (0.1)  | 2.2   | 8.8%               | 2.0%   | 16.0% |
| Animal Foods           | 17      | Beef                      | 3,248                         | 34.0  | 22.5  | 0.7 | 9.4       | 5.4    | 13.4  | 4.2%               | (2.9%) | 11.9% |
|                        | 18      | Chicken                   | 1,838                         | 67.9  | 50.2  | 0.7 | 2.6       | 0.9    | 4.3   | 8.8%               | (1.5%) | 20.2% |
|                        | 19      | Chicken eggs              | 3,187                         | 65.7  | 41.8  | 0.6 | 9.9       | 7.1    | 12.7  | 6.8%               | (0.1%) | 14.3% |
|                        | 20      | Cichlid, dried            | 2,736                         | 280.1 | 199.5 | 0.7 | 9.4       | 7.5    | 11.3  | 8.3%               | 1.2%   | 15.8% |
|                        | 21      | Fresh milk                | 2,828                         | 54.1  | 70.4  | 1.3 | 2.6       | (0.5)  | 5.7   | 3.3%               | (4.0%) | 11.1% |
|                        | 22      | Goat                      | 3,276                         | 74.3  | 44.4  | 0.6 | 9.3       | 7.9    | 10.7  | 9.1%               | 3.0%   | 15.5% |
|                        | 23      | Oreochromis lidole, dry   | 1,366                         | 316.1 | 251.8 | 0.8 | 10.1      | 6.4    | 13.8  | 5.1%               | (1.3%) | 11.9% |
|                        | 24      | Oreochromis lidole, fresh | 499                           | 141.4 | 139.1 | 1.0 | 9.7       | 7.1    | 12.3  | 8.4%               | (0.4%) | 18.0% |
|                        | 25      | Pork                      | 1,538                         | 35.0  | 16.7  | 0.5 | 8.7       | 5.3    | 12.0  | 5.5%               | (5.1%) | 17.3% |
|                        | 26      | Powdered milk             | 2,034                         | 27.2  | 20.9  | 0.8 | 11.0      | 8.3    | 13.8  | 11.3%              | 0.9%   | 22.6% |
| 27                     | Sardine | 3,406                     | 91.3                          | 65.6  | 0.7   | 6.8 | 6.0       | 7.5    | 15.4% | 6.0%               | 25.7%  |       |
| Fruits and Vegetables  | 28      | Avocado                   | 663                           | 20.5  | 12.4  | 0.6 | 10.7      | 9.7    | 11.6  | 32.8%              | 17.7%  | 49.9% |
|                        | 29      | Banana                    | 3,115                         | 24.5  | 19.6  | 0.8 | 8.1       | 6.9    | 9.3   | 6.3%               | (0.0%) | 13.1% |
|                        | 30      | Cabbage                   | 3,221                         | 37.5  | 26.9  | 0.7 | 2.1       | 1.9    | 2.3   | 46.9%              | 37.5%  | 57.0% |
|                        | 31      | Chinese cabbage           | 1,263                         | 151.4 | 102.5 | 0.7 | 1.5       | 0.9    | 2.2   | 33.0%              | 17.7%  | 50.2% |
|                        | 32      | Cucumber                  | 644                           | 177.4 | 98.0  | 0.6 | 9.5       | 8.7    | 10.2  | 52.7%              | 23.9%  | 88.1% |
|                        | 33      | Eggplant                  | 1,018                         | 107.0 | 56.5  | 0.5 | 1.6       | 0.7    | 2.4   | 19.2%              | 5.9%   | 34.2% |
|                        | 34      | Green beans               | 894                           | 155.9 | 98.9  | 0.6 | 2.9       | 1.1    | 4.8   | 15.2%              | (4.9%) | 39.5% |
|                        | 35      | Guava                     | 415                           | 30.2  | 16.6  | 0.6 | 9.3       | 7.7    | 10.9  | 25.1%              | 7.2%   | 46.1% |
|                        | 36      | Mangoes                   | 1,258                         | 19.4  | 16.0  | 0.8 | 6.4       | 5.5    | 7.3   | 38.2%              | 17.3%  | 62.9% |
|                        | 37      | Okra                      | 2,823                         | 78.1  | 77.9  | 1.0 | 9.4       | 8.8    | 10.0  | 28.7%              | 16.9%  | 41.6% |
|                        | 38      | Onions                    | 3,424                         | 97.8  | 79.6  | 0.8 | 3.8       | 3.3    | 4.2   | 41.8%              | 32.1%  | 52.1% |
|                        | 39      | Oranges                   | 546                           | 66.1  | 50.5  | 0.8 | 11.3      | 9.6    | 13.0  | 24.0%              | 5.7%   | 45.6% |
|                        | 40      | Papaya                    | 468                           | 67.3  | 50.6  | 0.8 | 2.6       | 1.7    | 3.5   | 32.8%              | 12.2%  | 57.2% |
|                        | 41      | Pumpkin                   | 406                           | 67.9  | 63.5  | 0.9 | 11.8      | 10.4   | 13.2  | 52.0%              | 17.8%  | 96.1% |
|                        | 42      | Pumpkin leaves            | 2,986                         | 196.9 | 162.3 | 0.8 | 9.2       | 8.6    | 9.9   | 20.7%              | 10.7%  | 31.6% |
|                        | 43      | Rape leaves               | 3,258                         | 46.0  | 37.0  | 0.8 | 1.5       | 1.1    | 2.0   | 32.7%              | 22.2%  | 44.2% |
|                        | 44      | Tomatoes                  | 3,432                         | 119.5 | 99.2  | 0.8 | 2.7       | 2.3    | 3.1   | 60.3%              | 46.1%  | 75.9% |
| Oils and Fats          | 45      | Cooking oil               | 3,030                         | 12.4  | 9.4   | 0.8 | 9.8       | 7.5    | 12.1  | 6.2%               | (0.7%) | 13.5% |
|                        | 46      | Cooking oil, refilled     | 3,202                         | 7.7   | 4.7   | 0.6 | 9.7       | 7.9    | 11.6  | 8.3%               | 1.6%   | 15.4% |
| Sweets                 | 47      | Brown sugar               | 3,392                         | 8.0   | 5.7   | 0.7 | 8.6       | 6.4    | 10.9  | 4.5%               | (1.2%) | 10.6% |
|                        | 48      | White sugar               | 2,903                         | 6.9   | 4.7   | 0.7 | 11.6      | 8.5    | 14.7  | 4.1%               | (0.3%) | 8.8%  |

Note: Peak time shows as a continuous variable from 0-12, where 0 indicates the start and 12 as the end of a calendar year.

**Table S3. Descriptive statistics and seasonality for monthly prices of all foods in Ethiopia between 2002 to 2016**

| Food Groups            | No | Food Items              | Food Prices (LCU per 100kcal) |      |     |     | Peak Time |        |      | Seasonal Intensity (%) |        |       |
|------------------------|----|-------------------------|-------------------------------|------|-----|-----|-----------|--------|------|------------------------|--------|-------|
|                        |    |                         | Obs.                          | Mean | SD  | CV  | Estimate  | 95% CI |      | Estimate               | 95% CI |       |
| Starchy Staples        | 1  | African millet          | 11,269                        | 0.2  | 0.1 | 0.7 | 8.4       | 7.9    | 8.9  | 11.1%                  | 9.0%   | 13.4% |
|                        | 2  | Barley black            | 12,423                        | 0.2  | 0.1 | 0.6 | 8.2       | 7.8    | 8.7  | 8.8%                   | 7.0%   | 10.6% |
|                        | 3  | Barley white            | 17,169                        | 0.2  | 0.1 | 0.6 | 8.3       | 8.0    | 8.7  | 10.0%                  | 8.6%   | 11.5% |
|                        | 4  | Barley white milled     | 1,033                         | 0.4  | 0.3 | 0.6 | 11.8      | 8.2    | 15.3 | 1.8%                   | (2.8%) | 6.7%  |
|                        | 5  | Bread wheat (bakery)    | 19,749                        | 0.4  | 0.2 | 0.5 | 7.8       | 6.6    | 9.0  | 1.6%                   | 0.5%   | 2.7%  |
|                        | 6  | Durrah                  | 8,071                         | 0.1  | 0.1 | 0.7 | 8.3       | 7.8    | 8.7  | 17.8%                  | 14.6%  | 21.1% |
|                        | 7  | Hulled barley           | 3,747                         | 0.2  | 0.2 | 0.7 | 9.1       | 8.2    | 10.0 | 6.7%                   | 4.0%   | 9.5%  |
|                        | 8  | Kocho (unprocessed)     | 8,271                         | 0.3  | 0.3 | 1.3 | 11.2      | 6.9    | 15.4 | 1.3%                   | (1.8%) | 4.4%  |
|                        | 9  | Maize (white)           | 19,180                        | 0.1  | 0.1 | 0.6 | 7.3       | 7.1    | 7.5  | 16.2%                  | 13.9%  | 18.5% |
|                        | 10 | Maize (white) milled    | 6,849                         | 0.2  | 0.1 | 0.6 | 7.8       | 7.3    | 8.2  | 9.1%                   | 7.0%   | 11.3% |
|                        | 11 | Oats                    | 4,886                         | 0.2  | 0.2 | 0.8 | 8.4       | 7.5    | 9.3  | 7.0%                   | 4.5%   | 9.6%  |
|                        | 12 | Oats milled             | 9,544                         | 0.4  | 0.3 | 0.7 | 9.5       | 7.4    | 11.5 | 1.2%                   | 0.4%   | 2.0%  |
|                        | 13 | Potatoes                | 20,162                        | 0.6  | 0.4 | 0.7 | 3.5       | 3.3    | 3.8  | 23.0%                  | 19.8%  | 26.3% |
|                        | 14 | Rice (imported)         | 18,032                        | 0.3  | 0.2 | 0.5 | 7.6       | 7.2    | 8.0  | 1.9%                   | 1.4%   | 2.3%  |
|                        | 15 | Sorghum milled          | 959                           | 0.2  | 0.1 | 0.6 | 9.7       | 5.4    | 14.0 | 9.2%                   | 0.1%   | 19.1% |
|                        | 16 | Sorghum red             | 13,867                        | 0.1  | 0.1 | 0.6 | 8.7       | 8.5    | 9.0  | 16.6%                  | 13.7%  | 19.6% |
|                        | 17 | Sorghum white           | 13,531                        | 0.1  | 0.1 | 0.7 | 8.6       | 8.3    | 8.9  | 13.9%                  | 11.8%  | 16.1% |
|                        | 18 | Spaghetti (local)       | 17,840                        | 0.5  | 0.2 | 0.5 | 7.4       | 6.9    | 7.9  | 2.3%                   | 1.5%   | 3.1%  |
|                        | 19 | Sweet potatoes          | 10,985                        | 0.3  | 0.2 | 0.9 | 6.3       | 5.8    | 6.9  | 8.3%                   | 4.5%   | 12.3% |
|                        | 20 | Teff black (red) milled | 1,697                         | 0.2  | 0.2 | 0.7 | 8.6       | 7.7    | 9.5  | 6.1%                   | 3.2%   | 9.0%  |
|                        | 21 | Teff mixed milled       | 2,685                         | 0.3  | 0.2 | 0.6 | 7.9       | 7.2    | 8.6  | 5.2%                   | 3.1%   | 7.3%  |
|                        | 22 | Teff white milled       | 2,590                         | 0.3  | 0.2 | 0.6 | 8.3       | 7.6    | 9.0  | 4.4%                   | 2.5%   | 6.4%  |
|                        | 23 | Wheat black (red)       | 12,893                        | 0.2  | 0.1 | 0.6 | 8.4       | 8.1    | 8.8  | 9.9%                   | 8.2%   | 11.6% |
|                        | 24 | Wheat mixed milled      | 824                           | 0.2  | 0.1 | 0.7 | 8.9       | 7.6    | 10.2 | 10.0%                  | 5.7%   | 14.6% |
|                        | 25 | Wheat white             | 17,905                        | 0.2  | 0.1 | 0.6 | 8.1       | 8.0    | 8.3  | 12.7%                  | 11.3%  | 14.0% |
|                        | 26 | Wheat white milled      | 1,838                         | 0.2  | 0.1 | 0.7 | 7.7       | 6.8    | 8.6  | 6.0%                   | 2.7%   | 9.4%  |
| Pulses, Nuts and Seeds | 27 | Chickpeas               | 19,275                        | 0.2  | 0.2 | 0.7 | 10.0      | 9.7    | 10.4 | 7.1%                   | 6.1%   | 8.1%  |
|                        | 28 | Fenugreek seed          | 18,027                        | 0.4  | 0.3 | 0.7 | 10.2      | 9.6    | 10.8 | 4.7%                   | 3.7%   | 5.7%  |
|                        | 29 | Ground nut shelled      | 14,075                        | 0.3  | 0.2 | 0.7 | 8.2       | 7.8    | 8.5  | 7.7%                   | 6.3%   | 9.0%  |
|                        | 30 | Haricot beans           | 10,816                        | 0.2  | 0.1 | 0.7 | 5.5       | 5.1    | 5.9  | 13.3%                  | 10.3%  | 16.3% |
|                        | 31 | Horse beans             | 19,620                        | 0.2  | 0.2 | 0.7 | 8.0       | 7.9    | 8.2  | 15.9%                  | 14.4%  | 17.5% |
|                        | 32 | Lentils                 | 18,589                        | 0.4  | 0.3 | 0.8 | 7.5       | 7.2    | 7.7  | 8.7%                   | 7.5%   | 10.0% |
|                        | 33 | Lima beans              | 6,277                         | 0.2  | 0.2 | 1.3 | 6.0       | 5.7    | 6.3  | 17.6%                  | 13.2%  | 22.1% |
|                        | 34 | Linseed red             | 18,124                        | 0.3  | 0.2 | 0.8 | 8.1       | 7.7    | 8.4  | 8.8%                   | 7.2%   | 10.5% |
|                        | 35 | Linseed white           | 3,726                         | 0.4  | 0.4 | 0.9 | 7.4       | 6.7    | 8.0  | 7.2%                   | 4.0%   | 10.5% |
|                        | 36 | Niger seed              | 14,939                        | 0.3  | 0.2 | 0.8 | 8.0       | 7.6    | 8.4  | 7.8%                   | 6.1%   | 9.6%  |
|                        | 37 | Peas green (dry)        | 10,640                        | 3.1  | 1.9 | 0.6 | 7.6       | 7.4    | 7.8  | 15.1%                  | 13.3%  | 17.0% |
|                        | 38 | Peas split              | 16,427                        | 0.4  | 0.2 | 0.7 | 6.6       | 6.3    | 6.9  | 4.6%                   | 3.7%   | 5.5%  |
|                        | 39 | Sesame seed             | 9,377                         | 0.3  | 0.2 | 0.8 | 7.0       | 6.5    | 7.5  | 7.5%                   | 4.8%   | 10.3% |
|                        | 40 | Soya beans              | 5,191                         | 0.2  | 0.2 | 0.7 | 7.6       | 7.3    | 8.0  | 13.6%                  | 10.5%  | 16.7% |
|                        | 41 | Sunflower seed          | 13,463                        | 0.4  | 0.3 | 0.7 | 10.1      | 8.0    | 12.2 | 1.9%                   | 0.3%   | 3.6%  |
|                        | 42 | Vetches                 | 11,125                        | 0.2  | 0.2 | 0.7 | 10.9      | 10.7   | 11.1 | 16.3%                  | 14.6%  | 18.0% |
| Animal Foods           | 43 | Beef                    | 18,312                        | 5.4  | 4.1 | 0.8 | 7.8       | 7.6    | 8.0  | 7.8%                   | 6.9%   | 8.6%  |
|                        | 44 | Camel meat              | 1,599                         | 1.9  | 1.7 | 0.9 | 8.4       | 6.7    | 10.1 | 4.5%                   | 1.1%   | 8.1%  |
|                        | 45 | Camel milk              | 2,108                         | 1.1  | 0.8 | 0.8 | 3.5       | 2.0    | 5.0  | 6.3%                   | 0.1%   | 12.8% |
|                        | 46 | Cheese cottage          | 9,761                         | 1.5  | 1.3 | 0.9 | 1.9       | (0.2)  | 4.1  | 2.3%                   | (0.2%) | 4.9%  |



|                              |    |                             |        |      |      |     |      |        |      |       |        |       |
|------------------------------|----|-----------------------------|--------|------|------|-----|------|--------|------|-------|--------|-------|
|                              | 47 | Cow milk (unpasteurized)    | 17,120 | 1.0  | 0.7  | 0.7 |      |        |      |       |        |       |
|                              |    |                             |        |      |      |     | 4.6  | 1.8    | 7.4  | 0.9%  | (0.3%) | 2.1%  |
|                              | 48 | Eggs                        | 20,139 | 2.3  | 1.7  | 0.7 | 10.2 | 9.9    | 10.5 | 8.1%  | 6.7%   | 9.6%  |
|                              | 49 | Fresh fish                  | 2,352  | 3.5  | 3.0  | 0.9 | 4.9  | 4.2    | 5.6  | 12.3% | 7.6%   | 17.1% |
|                              | 50 | Goat milk                   | 675    | 1.6  | 1.1  | 0.7 | 8.9  | (0.5)  | 18.2 | 1.5%  | (3.6%) | 7.0%  |
|                              | 51 | Sardines (imported)         | 9,246  | 6.2  | 3.9  | 0.6 | 4.5  | (13.8) | 22.9 | 0.1%  | (0.9%) | 1.2%  |
|                              | 52 | Yoghurt (traditional)       | 13,753 | 1.9  | 1.4  | 0.7 | 7.0  | 4.3    | 9.6  | 0.7%  | (0.8%) | 2.3%  |
|                              | 53 | Avocado                     | 11,877 | 1.0  | 0.7  | 0.7 | 11.9 | 11.4   | 12.4 | 9.0%  | 5.8%   | 12.3% |
|                              | 54 | Banana                      | 19,208 | 1.2  | 1.0  | 0.8 | 10.7 | 10.2   | 11.1 | 8.6%  | 6.8%   | 10.5% |
|                              | 55 | Beet root                   | 17,910 | 1.5  | 1.2  | 0.8 | 4.4  | 4.0    | 4.8  | 12.6% | 10.1%  | 15.1% |
|                              | 56 | Cabbage                     | 18,281 | 1.7  | 1.3  | 0.8 | 3.6  | 3.1    | 4.1  | 14.5% | 10.4%  | 18.9% |
|                              | 57 | Cactus                      | 927    | 1.1  | 1.1  | 1.0 | 1.4  | 0.9    | 2.0  | 55.5% | 25.3%  | 92.9% |
|                              | 58 | Carrot                      | 17,459 | 1.8  | 1.4  | 0.8 | 5.8  | 5.6    | 6.1  | 25.9% | 21.8%  | 30.1% |
|                              | 59 | Cauliflower                 | 1,143  | 17.9 | 14.4 | 0.8 | 4.2  | 0.3    | 8.2  | 4.9%  | (3.9%) | 14.4% |
|                              | 60 | Ethiopian kale              | 16,608 | 1.3  | 1.3  | 1.0 | 2.8  | 2.6    | 3.0  | 46.9% | 38.0%  | 56.4% |
|                              | 61 | Garlics                     | 19,322 | 2.5  | 2.2  | 0.9 | 6.5  | 6.2    | 6.7  | 22.4% | 19.5%  | 25.4% |
|                              | 62 | Grapes                      | 346    | 22.0 | 20.6 | 0.9 | 4.5  | 1.8    | 7.1  | 14.5% | (3.1%) | 35.3% |
|                              | 63 | Green peas                  | 4,071  | 4.3  | 3.0  | 0.7 | 0.7  | (2.1)  | 3.4  | 3.0%  | (1.3%) | 7.5%  |
| <b>Fruits and Vegetables</b> | 64 | Green pepper                | 19,113 | 4.3  | 3.4  | 0.8 | 3.5  | 3.2    | 3.8  | 27.3% | 23.3%  | 31.5% |
|                              | 65 | Hot pepper (dried)          | 15,342 | 1.0  | 0.8  | 0.8 | 7.5  | 7.4    | 7.6  | 26.6% | 24.3%  | 28.9% |
|                              | 66 | Leaks                       | 5,677  | 2.0  | 1.7  | 0.9 | 10.5 | 9.4    | 11.7 | 8.0%  | 3.6%   | 12.5% |
|                              | 67 | Lemon                       | 17,749 | 2.5  | 2.4  | 1.0 | 2.7  | 2.5    | 2.9  | 60.7% | 52.1%  | 69.9% |
|                              | 68 | Lettuce                     | 9,060  | 5.6  | 5.6  | 1.0 | 3.7  | 2.2    | 5.2  | 6.0%  | 0.9%   | 11.4% |
|                              | 69 | Mandarine                   | 2,017  | 2.6  | 2.1  | 0.8 | 4.3  | 3.4    | 5.2  | 12.4% | 6.2%   | 19.1% |
|                              | 70 | Mango                       | 11,235 | 2.8  | 2.2  | 0.8 | 0.7  | 0.2    | 1.2  | 16.2% | 11.1%  | 21.5% |
|                              | 71 | Onions                      | 19,655 | 1.1  | 0.7  | 0.6 | 10.7 | 10.3   | 11.0 | 13.6% | 11.6%  | 15.8% |
|                              | 72 | Orange                      | 15,207 | 5.0  | 4.6  | 0.9 | 3.5  | 3.1    | 4.0  | 12.8% | 9.5%   | 16.3% |
|                              | 73 | Papaya                      | 12,767 | 2.0  | 2.1  | 1.0 | 8.8  | 8.0    | 9.6  | 6.2%  | 3.4%   | 9.1%  |
|                              | 74 | Pumpkin                     | 9,599  | 0.5  | 0.4  | 0.9 | 4.0  | 3.4    | 4.5  | 17.1% | 12.6%  | 21.7% |
|                              | 75 | Spinach                     | 9,859  | 1.3  | 1.2  | 0.9 | 2.1  | 1.5    | 2.8  | 15.7% | 8.7%   | 23.1% |
|                              | 76 | Tomatoes                    | 18,562 | 3.1  | 2.4  | 0.8 | 9.0  | 8.8    | 9.3  | 38.7% | 31.7%  | 46.2% |
|                              | 77 | Butter unrefined            | 18,461 | 1.0  | 0.7  | 0.7 | 4.8  | 4.5    | 5.1  | 12.1% | 10.1%  | 14.0% |
| <b>Oils and Fats</b>         | 78 | Cooking oil (imported)      | 17,971 | 0.2  | 0.1  | 0.4 | 3.7  | 2.6    | 4.9  | 1.3%  | 0.8%   | 1.9%  |
|                              | 79 | Cooking oil (local)         | 12,305 | 0.3  | 0.2  | 0.7 | 7.9  | 7.4    | 8.5  | 3.5%  | 2.4%   | 4.6%  |
|                              | 80 | Vegetable butter (imported) | 10,047 | 2.1  | 0.8  | 0.4 | 7.3  | 6.7    | 8.0  | 1.8%  | 1.0%   | 2.7%  |
| <b>Sweets</b>                | 81 | Honey                       | 14,745 | 1.3  | 1.0  | 0.8 | 3.3  | 2.0    | 4.7  | 2.1%  | 1.0%   | 3.1%  |
|                              | 82 | Sugar                       | 18,651 | 0.3  | 0.1  | 0.5 | 6.4  | 6.1    | 6.7  | 3.0%  | 2.2%   | 3.8%  |

**Note:** Peak time shows as a continuous variable from 0-12, where 0 indicates the start and 12 as the end of a calendar year.

**Table S4. Descriptive statistics and seasonality for national CoNA, CoCA, CoNA premium, energy composition and cost components of CoNA by food groups, and regional CoNA in Tanzania between 2011-2015**

| Categories                                | No | Items                  | Obs.  | Mean    | SD    | CV  | Peak Time |        |      | Seasonal Intensity |        |       |
|-------------------------------------------|----|------------------------|-------|---------|-------|-----|-----------|--------|------|--------------------|--------|-------|
|                                           |    |                        |       |         |       |     | Estimate  | 95% CI |      | Estimate           | 95% CI |       |
| <b>Indicators (LCU)</b>                   | 1  | CoNA                   | 1,236 | 912.1   | 172.3 | 0.2 | 1.9       | 1.3    | 2.5  | 6.3%               | 3.7%   | 9.0%  |
|                                           | 2  | CoCA                   | 1,236 | 378.4   | 122.0 | 0.3 | 2.4       | 1.2    | 3.5  | 5.9%               | 0.8%   | 11.3% |
|                                           | 3  | CoNA premium           | 1,236 | 533.7   | 133.5 | 0.3 | 1.7       | 0.9    | 2.5  | 6.3%               | 2.4%   | 10.4% |
| <b>CoNA Energy Composition (kcal)</b>     | 1  | Starchy Staples        | 1,236 | 1,317.8 | 78.6  | 0.1 | 10.3      | 4.6    | 15.9 | 6.1                | (7.5)  | 19.7  |
|                                           | 2  | Pulses, Nuts and Seeds | 1,236 | 618.9   | 146.2 | 0.2 | 4.0       | (2.0)  | 10.0 | 8.2                | (11.5) | 28.0  |
|                                           | 3  | Animal Foods           | 1,236 | 153.8   | 115.6 | 0.8 | 6.0       | (0.8)  | 12.8 | 4.6                | (12.1) | 21.4  |
|                                           | 4  | Fruits and Vegetables  | 1,236 | 13.0    | 15.6  | 1.2 | 8.0       | 5.7    | 10.3 | 2.6                | (1.7)  | 7.0   |
|                                           | 5  | Oils and Fats          | 1,236 | 4.1     | 31.0  | 7.5 | 12.0      | 10.2   | 13.8 | 6.2                | (2.1)  | 14.6  |
|                                           | 6  | Sweets                 | 1,236 | 0.0     | 0.0   | .   | .         | .      | .    | .                  | .      | .     |
| <b>CoNA and Cost Components (2011USD)</b> | 1  | Starchy Staples        | 1,236 | 0.5     | 0.1   | 0.3 | 2.3       | 1.3    | 3.3  | 0.03               | 0.01   | 0.05  |
|                                           | 2  | Pulses, Nuts and Seeds | 1,236 | 0.4     | 0.1   | 0.3 | 2.8       | 1.8    | 3.8  | 0.03               | 0.01   | 0.05  |
|                                           | 3  | Animal Foods           | 1,236 | 0.6     | 0.2   | 0.4 | 0.9       | (1.1)  | 2.9  | 0.02               | (0.01) | 0.06  |
|                                           | 4  | Fruits and Vegetables  | 1,236 | 0.1     | 0.0   | 0.8 | 3.6       | 0.9    | 6.3  | 0.01               | (0.00) | 0.02  |
|                                           | 5  | Oils and Fats          | 1,236 | 0.0     | 0.0   | 7.6 | 0.1       | (1.8)  | 1.9  | 0.00               | (0.00) | 0.01  |
|                                           | 6  | Sweets                 | 1,236 | 0.0     | 0.0   | .   | .         | .      | .    | .                  | .      | .     |
|                                           | 7  | CoNA                   | 1,236 | 1.5     | 0.2   | 0.2 | 2.2       | 1.5    | 2.9  | 0.08               | 0.05   | 0.12  |
| <b>Regional CoNA (LCU)</b>                | 1  | Dodoma                 | 60    | 947.6   | 142.7 | 0.2 | 1.4       | 0.2    | 2.6  | 12.9%              | (0.2%) | 27.7% |
|                                           | 2  | Kilimanjaro            | 60    | 1048.9  | 171.9 | 0.2 | 6.9       | 5.3    | 8.4  | 4.6%               | (0.7%) | 10.2% |
|                                           | 3  | Arusha                 | 60    | 1062.2  | 182.7 | 0.2 | 2.9       | 2.1    | 3.8  | 9.4%               | 5.0%   | 13.9% |
|                                           | 4  | Tanga                  | 60    | 865.4   | 111.1 | 0.1 | 3.2       | 1.7    | 4.7  | 6.1%               | 1.5%   | 10.9% |
|                                           | 5  | Morogoro               | 60    | 1051.9  | 117.1 | 0.1 | 4.3       | 3.4    | 5.2  | 9.1%               | 6.2%   | 12.1% |
|                                           | 6  | Pwani                  | 60    | 945.8   | 73.4  | 0.1 | 2.3       | 1.3    | 3.3  | 7.1%               | 2.0%   | 12.3% |
|                                           | 7  | Dsm                    | 60    | 1145.2  | 164.0 | 0.1 | 9.7       | 1.6    | 17.9 | 0.9%               | (1.9%) | 3.8%  |
|                                           | 8  | Lindi                  | 60    | 1036.2  | 155.5 | 0.2 | 2.6       | 1.9    | 3.3  | 8.0%               | 4.5%   | 11.6% |
|                                           | 9  | Mtwara                 | 60    | 921.0   | 126.4 | 0.1 | 4.1       | 2.2    | 5.9  | 8.0%               | 2.7%   | 13.6% |
|                                           | 10 | Ruvuma                 | 60    | 788.1   | 109.7 | 0.1 | 2.6       | 0.7    | 4.5  | 5.7%               | (1.1%) | 13.1% |
|                                           | 11 | Iringa                 | 60    | 880.8   | 137.0 | 0.2 | 1.9       | 1.2    | 2.5  | 13.5%              | 6.0%   | 21.4% |
|                                           | 12 | Mbeya                  | 60    | 852.9   | 83.4  | 0.1 | 1.5       | 0.7    | 2.3  | 7.6%               | 2.3%   | 13.2% |
|                                           | 13 | Singida                | 60    | 932.5   | 194.9 | 0.2 | 1.1       | 0.2    | 1.9  | 24.7%              | 8.2%   | 43.7% |
|                                           | 14 | Tabora                 | 60    | 891.3   | 118.2 | 0.1 | 2.6       | 1.9    | 3.2  | 9.5%               | 5.6%   | 13.5% |
|                                           | 15 | Rukwa                  | 60    | 765.5   | 118.2 | 0.2 | 0.9       | (0.4)  | 2.3  | 6.7%               | (0.1%) | 13.9% |
|                                           | 16 | Kigoma                 | 60    | 654.5   | 68.3  | 0.1 | 1.1       | 0.5    | 1.6  | 18.2%              | 9.9%   | 27.2% |
|                                           | 17 | Shinyanga              | 60    | 900.0   | 180.2 | 0.2 | 0.5       | (0.8)  | 1.7  | 8.9%               | 1.9%   | 16.4% |
|                                           | 18 | Kagera                 | 60    | 796.0   | 109.2 | 0.1 | 0.3       | (2.1)  | 2.6  | 3.6%               | (1.3%) | 8.8%  |
|                                           | 19 | Mwanza                 | 60    | 908.8   | 77.1  | 0.1 | 1.8       | 0.1    | 3.5  | 2.4%               | (0.8%) | 5.8%  |
|                                           | 20 | Mara                   | 48    | 830.0   | 103.7 | 0.1 | 12.0      | 8.6    | 15.3 | 3.8%               | (2.5%) | 10.6% |
|                                           | 21 | Manyara                | 48    | 912.7   | 78.6  | 0.1 | 3.3       | 1.0    | 5.6  | 4.2%               | (0.4%) | 9.0%  |

**Note:** Peak time shows as a continuous variable from 0-12, where 0 indicates the start and 12 as the end of a calendar year.

**Table S5. Descriptive statistics and seasonality for national CoNA, CoCA, CoNA premium, energy composition and cost components of CoNA by food groups, and regional CoNA in Malawi between 2007-2016**

| Categories                                | No | Items                  | Obs.  | Mean    | SD    | CV   | Peak Time |        |      | Seasonal Intensity |         |       |
|-------------------------------------------|----|------------------------|-------|---------|-------|------|-----------|--------|------|--------------------|---------|-------|
|                                           |    |                        |       |         |       |      | Estimate  | 95% CI |      | Estimate           | 95% CI  |       |
| <b>Indicators (LCU)</b>                   | 1  | CoNA                   | 3,480 | 129.6   | 73.6  | 0.6  | 1.1       | 0.6    | 1.7  | 10.0%              | 5.7%    | 14.6% |
|                                           | 2  | CoCA                   | 3,480 | 41.6    | 30.6  | 0.7  | 1.5       | 0.4    | 2.6  | 8.0%               | 1.5%    | 14.9% |
|                                           | 3  | CoNA premium           | 3,480 | 88.0    | 54.6  | 0.6  | 0.8       | (0.1)  | 1.7  | 9.0%               | 2.7%    | 15.6% |
| <b>CoNA Energy Composition (kcal)</b>     | 1  | Starchy Staples        | 3,480 | 1,387.9 | 261.2 | 0.2  | 8.2       | 7.2    | 9.2  | 55.6               | 19.8    | 91.4  |
|                                           | 2  | Pulses, Nuts and Seeds | 3,480 | 372.5   | 261.6 | 0.7  | 7.8       | 5.9    | 9.7  | 34.6               | (9.7)   | 79.0  |
|                                           | 3  | Animal Foods           | 3,480 | 115.4   | 173.0 | 1.5  | 2.8       | (0.1)  | 5.8  | 12.7               | (7.6)   | 33.0  |
|                                           | 4  | Fruits and Vegetables  | 3,480 | 89.9    | 127.1 | 1.4  | 2.0       | 1.3    | 2.7  | 39.8               | 21.0    | 58.7  |
|                                           | 5  | Oils and Fats          | 3,480 | 132.5   | 150.3 | 1.1  | 1.5       | 0.1    | 3.0  | 24.7               | (0.4)   | 49.8  |
|                                           | 6  | Sweets                 | 3,480 | 9.4     | 78.3  | 8.3  | 2.4       | 1.2    | 3.6  | 14.7               | 3.1     | 26.4  |
| <b>CoNA and Cost Components (2011USD)</b> | 1  | Starchy Staples        | 3,480 | 0.4     | 0.2   | 0.5  | 1.3       | (0.5)  | 3.1  | 0.02               | (0.01)  | 0.04  |
|                                           | 2  | Pulses, Nuts and Seeds | 3,480 | 0.2     | 0.1   | 0.6  | 10.9      | 8.0    | 13.8 | 0.02               | (0.00)  | 0.03  |
|                                           | 3  | Animal Foods           | 3,480 | 0.3     | 0.2   | 0.5  | 4.4       | 2.0    | 6.8  | 0.02               | 0.00    | 0.03  |
|                                           | 4  | Fruits and Vegetables  | 3,480 | 0.2     | 0.2   | 1.0  | 1.1       | 0.6    | 1.6  | 0.08               | 0.05    | 0.11  |
|                                           | 5  | Oils and Fats          | 3,480 | 0.1     | 0.1   | 1.1  | 1.5       | 0.2    | 2.8  | 0.02               | 0.00    | 0.04  |
|                                           | 6  | Sweets                 | 3,480 | 0.0     | 0.0   | 13.4 | 2.2       | 0.2    | 4.1  | 0.00               | (0.00)  | 0.01  |
|                                           | 7  | CoNA                   | 3,480 | 1.2     | 0.4   | 0.3  | 1.3       | 0.8    | 1.8  | 0.13               | 0.08    | 0.17  |
| <b>Regional CoNA (LCU)</b>                | 1  | Balaka                 | 120   | 134.1   | 91.8  | 0.7  | 0.8       | (0.1)  | 1.7  | 22.4%              | 6.6%    | 40.6% |
|                                           | 2  | Karonga                | 240   | 142.5   | 75.4  | 0.5  | 2.8       | 1.5    | 4.1  | 14.0%              | 2.2%    | 27.2% |
|                                           | 3  | Mulanje                | 120   | 132.1   | 73.8  | 0.6  | 1.7       | 0.7    | 2.6  | 19.9%              | 3.9%    | 38.3% |
|                                           | 4  | Chitipa                | 120   | 125.6   | 73.9  | 0.6  | 10.7      | 7.0    | 14.4 | 7.2%               | (1.4%)  | 16.6% |
|                                           | 5  | Dedza                  | 120   | 121.6   | 71.0  | 0.6  | 5.1       | (1.1)  | 11.3 | 7.0%               | (7.7%)  | 24.0% |
|                                           | 6  | Mzimba                 | 240   | 145.9   | 81.3  | 0.6  | 2.4       | 0.9    | 3.9  | 14.0%              | 4.7%    | 24.2% |
|                                           | 7  | Zomba                  | 120   | 129.2   | 73.8  | 0.6  | 1.9       | (0.5)  | 4.2  | 9.1%               | (7.7%)  | 28.8% |
|                                           | 8  | Kasungu                | 120   | 95.1    | 46.7  | 0.5  | 10.0      | 7.7    | 12.3 | 28.4%              | 4.9%    | 57.1% |
|                                           | 9  | Machinga               | 120   | 143.6   | 86.5  | 0.6  | 6.4       | (3.9)  | 16.6 | 2.0%               | (10.1%) | 15.8% |
|                                           | 10 | Blantyre               | 120   | 105.5   | 59.4  | 0.6  | 0.7       | (0.1)  | 1.5  | 28.5%              | 11.1%   | 48.6% |
|                                           | 11 | Mangochi               | 120   | 129.2   | 73.8  | 0.6  | 1.9       | (0.5)  | 4.2  | 9.1%               | (7.7%)  | 28.8% |
|                                           | 12 | Chiradzulu             | 120   | 113.5   | 67.4  | 0.6  | 1.0       | (0.2)  | 2.2  | 11.8%              | 0.6%    | 24.2% |
|                                           | 13 | Mchinji                | 120   | 96.1    | 43.9  | 0.5  | 2.6       | 0.4    | 4.9  | 14.2%              | (5.2%)  | 37.7% |
|                                           | 14 | Lilongwe               | 360   | 119.4   | 58.3  | 0.5  | 0.3       | (1.0)  | 1.5  | 17.1%              | 4.3%    | 31.5% |
|                                           | 15 | Dowa                   | 120   | 138.7   | 64.9  | 0.5  | 11.7      | 10.5   | 12.8 | 35.2%              | 15.5%   | 58.2% |
|                                           | 16 | Mwanza                 | 120   | 134.5   | 72.6  | 0.5  | 1.5       | 0.6    | 2.4  | 13.0%              | 2.7%    | 24.3% |
|                                           | 17 | Chikwawa               | 120   | 138.5   | 79.2  | 0.6  | 1.3       | 0.4    | 2.1  | 16.9%              | 4.9%    | 30.2% |
|                                           | 18 | Nkhata Bay             | 120   | 142.1   | 83.4  | 0.6  | 3.6       | (1.4)  | 8.7  | 4.7%               | (4.5%)  | 14.8% |
|                                           | 19 | Nkhotakota             | 120   | 147.6   | 72.8  | 0.5  | 0.9       | (1.0)  | 2.7  | 15.6%              | (5.5%)  | 41.4% |
|                                           | 20 | Nsanje                 | 120   | 124.7   | 72.7  | 0.6  | 0.8       | (0.7)  | 2.3  | 7.8%               | (1.0%)  | 17.5% |
|                                           | 21 | Ntcheu                 | 120   | 131.5   | 85.0  | 0.7  | 0.7       | (0.4)  | 1.9  | 24.8%              | 4.0%    | 49.7% |
|                                           | 22 | Phalombe               | 120   | 134.3   | 80.7  | 0.6  | 2.8       | 1.6    | 3.9  | 16.2%              | 5.0%    | 28.7% |
|                                           | 23 | Rumphu                 | 120   | 141.1   | 79.1  | 0.6  | 3.1       | (1.4)  | 7.5  | 4.4%               | (5.4%)  | 15.1% |
|                                           | 24 | Salima                 | 120   | 133.2   | 73.9  | 0.6  | 6.0       | 3.2    | 8.8  | 17.0%              | (7.0%)  | 47.2% |
|                                           | 25 | Thyolo                 | 120   | 131.3   | 63.2  | 0.5  | 0.4       | (1.1)  | 2.0  | 12.3%              | 0.4%    | 25.7% |

**Note:** Peak time shows as a continuous variable from 0-12, where 0 indicates the start and 12 as the end of a calendar year.

**Table S6. Descriptive statistics and seasonality for national CoNA, CoCA, CoNA premium, energy composition and cost components of CoNA by food groups, and regional CoNA in Ethiopia between 2002-2016**

| Categories                                | No | Items                  | Obs.   | Mean    | SD    | CV   | Peak Time |        |      | Seasonal Intensity |        |       |
|-------------------------------------------|----|------------------------|--------|---------|-------|------|-----------|--------|------|--------------------|--------|-------|
|                                           |    |                        |        |         |       |      | Estimate  | 95% CI |      | Estimate           | 95% CI |       |
| <b>Indicators (LCU)</b>                   | 1  | CoNA                   | 20,704 | 6.7     | 5.1   | 0.8  | 6.6       | 6.1    | 7.2  | 4.0%               | 2.5%   | 5.5%  |
|                                           | 2  | CoCA                   | 20,806 | 1.9     | 1.2   | 0.6  | 7.9       | 7.7    | 8.1  | 13.9%              | 12.2%  | 15.6% |
|                                           | 3  | CoNA premium           | 20,704 | 4.8     | 4.3   | 0.9  | 3.6       | 2.9    | 4.3  | 5.3%               | 3.8%   | 6.8%  |
| <b>CoNA Energy Composition (kcal)</b>     | 1  | Starchy Staples        | 20,704 | 1,088.7 | 371.7 | 0.3  | 3.3       | 2.5    | 4.2  | 50.9               | 31.6   | 70.2  |
|                                           | 2  | Pulses, Nuts and Seeds | 20,704 | 521.8   | 387.9 | 0.7  | 9.3       | 6.1    | 12.4 | 14.6               | (5.3)  | 34.6  |
|                                           | 3  | Animal Foods           | 20,704 | 277.0   | 131.7 | 0.5  | 7.2       | 5.8    | 8.5  | 8.1                | 0.7    | 15.5  |
|                                           | 4  | Fruits and Vegetables  | 20,704 | 120.4   | 128.5 | 1.1  | 9.8       | 8.7    | 11.0 | 15.8               | 9.2    | 22.5  |
|                                           | 5  | Oils and Fats          | 20,704 | 99.1    | 152.1 | 1.5  | 9.8       | 8.8    | 10.8 | 18.1               | 11.7   | 24.4  |
|                                           | 6  | Sweets                 | 20,704 | 0.7     | 14.7  | 22.7 | 6.7       | 4.6    | 8.7  | 0.5                | (0.4)  | 1.4   |
| <b>CoNA and Cost Components (2011USD)</b> | 1  | Starchy Staples        | 20,704 | 0.23    | 0.11  | 0.5  | 7.1       | 6.2    | 7.9  | 0.01               | 0.01   | 0.02  |
|                                           | 2  | Pulses, Nuts and Seeds | 20,704 | 0.21    | 0.14  | 0.7  | 6.3       | 5.1    | 7.4  | 0.01               | 0.00   | 0.02  |
|                                           | 3  | Animal Foods           | 20,704 | 0.67    | 0.27  | 0.4  | 6.3       | 4.4    | 8.1  | 0.01               | (0.00) | 0.02  |
|                                           | 4  | Fruits and Vegetables  | 20,704 | 0.17    | 0.26  | 1.5  | 5.9       | 5.1    | 6.7  | 0.03               | 0.01   | 0.04  |
|                                           | 5  | Oils and Fats          | 20,704 | 0.06    | 0.13  | 2.2  | 9.7       | 8.4    | 11.1 | 0.01               | 0.01   | 0.02  |
|                                           | 6  | Sweets                 | 20,704 | 0.00    | 0.01  | 23.2 | 6.4       | 4.4    | 8.4  | 0.00               | (0.00) | 0.00  |
|                                           | 7  | CoNA                   | 20,704 | 1.34    | 0.48  | 0.4  | 6.6       | 6.0    | 7.2  | 0.06               | 0.03   | 0.08  |
| <b>Regional CoNA (LCU)</b>                | 1  | North Western Tigray   | 360    | 6.6     | 4.0   | 0.6  | 8.7       | 7.3    | 10.1 | 7.4%               | 3.3%   | 11.7% |
|                                           | 2  | Central Tigray         | 358    | 6.1     | 3.6   | 0.6  | 9.1       | 7.8    | 10.4 | 6.4%               | 3.6%   | 9.2%  |
|                                           | 3  | Eastern Tigray         | 357    | 6.7     | 4.8   | 0.7  | 8.4       | 6.2    | 10.6 | 5.4%               | 0.2%   | 10.9% |
|                                           | 4  | South Tigray           | 360    | 6.9     | 5.8   | 0.8  | 9.3       | 7.6    | 10.9 | 9.4%               | (0.3%) | 19.9% |
|                                           | 5  | Awsi (Zone 1)          | 360    | 7.4     | 4.7   | 0.6  | 9.6       | 7.3    | 12.0 | 5.5%               | 1.5%   | 9.5%  |
|                                           | 6  | Gabi (Zone 3)          | 360    | 7.3     | 4.8   | 0.7  | 9.0       | 7.1    | 10.9 | 4.3%               | 1.4%   | 7.3%  |
|                                           | 7  | North Gonder           | 359    | 6.2     | 3.7   | 0.6  | 6.7       | 1.6    | 11.8 | 2.0%               | (6.4%) | 11.2% |
|                                           | 8  | South Gonder           | 360    | 5.2     | 3.0   | 0.6  | 7.5       | 6.1    | 8.8  | 9.1%               | 1.2%   | 17.6% |
|                                           | 9  | North Wollo            | 360    | 5.9     | 3.7   | 0.6  | 10.3      | 6.1    | 14.6 | 2.5%               | (1.6%) | 6.7%  |
|                                           | 10 | South Wollo            | 359    | 5.5     | 3.3   | 0.6  | 9.6       | 7.8    | 11.3 | 4.3%               | 1.8%   | 6.9%  |
|                                           | 11 | North Shewa (R3)       | 358    | 6.9     | 5.6   | 0.8  | 8.1       | 5.9    | 10.2 | 5.4%               | (0.5%) | 11.7% |
|                                           | 12 | East Gojam             | 359    | 5.4     | 3.2   | 0.6  | 5.3       | 2.2    | 8.3  | 2.7%               | (2.0%) | 7.6%  |
|                                           | 13 | West Gojam             | 359    | 5.2     | 3.3   | 0.6  | 8.3       | 5.9    | 10.7 | 5.2%               | (0.8%) | 11.5% |
|                                           | 14 | Wag Himra              | 330    | 7.4     | 4.5   | 0.6  | 8.2       | 6.5    | 9.9  | 9.9%               | 2.3%   | 18.1% |
|                                           | 15 | Aw/Agew                | 360    | 5.4     | 3.4   | 0.6  | 8.9       | 6.1    | 11.7 | 4.7%               | 0.8%   | 8.7%  |
|                                           | 16 | Oromia                 | 180    | 5.4     | 3.0   | 0.5  | 7.1       | 6.0    | 8.2  | 6.0%               | 0.8%   | 11.5% |
|                                           | 17 | West Wellega           | 359    | 6.1     | 3.8   | 0.6  | 7.3       | 5.7    | 8.8  | 4.7%               | (0.6%) | 10.2% |
|                                           | 18 | East Wellega           | 360    | 6.3     | 4.2   | 0.7  | 5.2       | 3.7    | 6.8  | 11.7%              | 3.2%   | 20.9% |
|                                           | 19 | Ilubabor               | 360    | 5.6     | 3.8   | 0.7  | 6.7       | 5.5    | 7.9  | 6.6%               | 0.0%   | 13.6% |
|                                           | 20 | Jimma                  | 360    | 5.8     | 4.0   | 0.7  | 3.7       | (0.1)  | 7.5  | 2.1%               | (0.5%) | 4.9%  |
|                                           | 21 | West Shewa             | 358    | 5.9     | 3.5   | 0.6  | 0.8       | (1.1)  | 2.7  | 5.2%               | (0.3%) | 10.9% |
|                                           | 22 | North Shewa (R4)       | 356    | 7.6     | 5.9   | 0.8  | 7.7       | 5.4    | 9.9  | 6.6%               | (2.4%) | 16.3% |
|                                           | 23 | East Shewa             | 360    | 6.0     | 3.6   | 0.6  | 6.3       | 4.7    | 7.8  | 3.1%               | (0.9%) | 7.4%  |
|                                           | 24 | Arsi                   | 356    | 6.4     | 5.3   | 0.8  | 6.1       | 5.3    | 6.9  | 13.0%              | 3.0%   | 24.0% |
|                                           | 25 | West Harerge           | 358    | 6.5     | 4.3   | 0.7  | 5.9       | 5.3    | 6.4  | 13.6%              | 7.7%   | 19.9% |
|                                           | 26 | East Harerge           | 360    | 6.6     | 4.5   | 0.7  | 4.0       | 2.4    | 5.5  | 12.7%              | 6.4%   | 19.3% |
|                                           | 27 | Bale                   | 355    | 6.2     | 4.0   | 0.6  | 5.7       | 4.0    | 7.4  | 4.1%               | (0.8%) | 9.3%  |
|                                           | 28 | Borena                 | 359    | 7.4     | 5.0   | 0.7  | 3.2       | (0.9)  | 7.3  | 3.5%               | (1.2%) | 8.4%  |
|                                           | 29 | Siti                   | 360    | 14.0    | 14.0  | 1.0  | 10.7      | 7.5    | 13.9 | 7.1%               | (3.0%) | 18.3% |
|                                           | 30 | Fafan                  | 360    | 8.4     | 5.3   | 0.6  | 2.9       | 1.0    | 4.8  | 6.7%               | 0.2%   | 13.6% |

|    |                 |       |     |     |     |      |        |      |       |        |       |
|----|-----------------|-------|-----|-----|-----|------|--------|------|-------|--------|-------|
| 31 | Liben           | 359   | 9.7 | 7.4 | 0.8 | 6.0  | 4.4    | 7.6  | 7.7%  | (2.1%) | 18.5% |
| 32 | Metekel         | 359   | 7.1 | 5.5 | 0.8 | 5.6  | 4.7    | 6.6  | 13.9% | 4.8%   | 23.7% |
| 33 | Asosa           | 360   | 6.2 | 4.0 | 0.7 | 7.3  | 3.9    | 10.8 | 3.3%  | (4.6%) | 11.8% |
| 34 | Kemashi         | 355   | 6.8 | 4.6 | 0.7 | 4.7  | 4.0    | 5.3  | 25.2% | 16.9%  | 34.1% |
| 35 | Gurage          | 359   | 6.3 | 4.1 | 0.7 | 6.7  | 2.8    | 10.6 | 1.9%  | (4.1%) | 8.2%  |
| 36 | Hadiya          | 360   | 6.1 | 3.7 | 0.6 | 4.6  | 2.7    | 6.6  | 7.0%  | (0.1%) | 14.6% |
| 37 | Kembata Timbaro | 359   | 7.8 | 6.2 | 0.8 | 6.6  | 2.9    | 10.2 | 2.5%  | (5.1%) | 10.6% |
| 38 | Sidama          | 356   | 6.1 | 3.9 | 0.6 | 5.9  | 4.7    | 7.1  | 7.2%  | 0.5%   | 14.3% |
| 39 | Gedio           | 360   | 7.5 | 5.5 | 0.7 | 0.1  | (9.4)  | 9.6  | 0.8%  | (4.6%) | 6.6%  |
| 40 | Wolayita        | 359   | 6.2 | 5.1 | 0.8 | 5.4  | 3.2    | 7.7  | 5.0%  | (2.2%) | 12.8% |
| 41 | South Omo       | 347   | 5.9 | 4.5 | 0.8 | 6.3  | 4.5    | 8.1  | 7.1%  | (3.5%) | 18.9% |
| 42 | Sheka           | 360   | 5.3 | 3.3 | 0.6 | 6.1  | 4.0    | 8.1  | 3.8%  | (2.4%) | 10.4% |
| 43 | Keffa           | 360   | 5.3 | 3.6 | 0.7 | 4.8  | 2.2    | 7.3  | 6.1%  | (0.7%) | 13.5% |
| 44 | Gamo Gofa       | 359   | 5.6 | 3.5 | 0.6 | 5.4  | 2.4    | 8.4  | 3.5%  | (3.0%) | 10.4% |
| 45 | Bench Maji      | 350   | 5.4 | 3.3 | 0.6 | 2.8  | (4.7)  | 10.3 | 2.6%  | (4.5%) | 10.3% |
| 46 | Yem             | 177   | 8.5 | 6.2 | 0.7 | 5.5  | 4.9    | 6.0  | 36.7% | 22.7%  | 52.3% |
| 47 | Segen Peoples'  | 717   | 6.5 | 4.8 | 0.8 | 6.4  | 5.5    | 7.2  | 10.2% | 2.5%   | 18.4% |
| 48 | Dawro           | 350   | 7.8 | 5.4 | 0.7 | 3.7  | 2.0    | 5.5  | 10.7% | (2.9%) | 26.3% |
| 49 | Basketo         | 180   | 6.3 | 5.4 | 0.9 | 6.1  | 4.9    | 7.3  | 13.8% | 0.3%   | 29.1% |
| 50 | Konta           | 177   | 8.3 | 5.8 | 0.7 | 11.5 | 10.0   | 13.0 | 6.7%  | 0.2%   | 13.6% |
| 51 | Nuer            | 175   | 7.5 | 4.6 | 0.6 | 6.1  | 5.1    | 7.1  | 14.4% | 2.4%   | 27.7% |
| 52 | Agnuak          | 222   | 8.1 | 9.1 | 1.1 | 6.2  | 5.2    | 7.2  | 27.7% | 3.4%   | 57.8% |
| 53 | Majang          | 97    | 7.6 | 2.6 | 0.4 | 0.8  | (1.1)  | 2.7  | 8.5%  | (4.4%) | 23.0% |
| 54 | Hareri          | 180   | 6.5 | 3.8 | 0.6 | 0.6  | (26.2) | 27.4 | 0.2%  | (4.1%) | 4.7%  |
| 55 | Region 14       | 1,968 | 7.2 | 4.7 | 0.7 | 8.9  | 8.3    | 9.4  | 8.0%  | 5.8%   | 10.1% |
| 56 | Chirkos         | 179   | 6.1 | 4.2 | 0.7 | 8.5  | 7.5    | 9.5  | 11.9% | 6.8%   | 17.3% |
| 57 | Dire Dawa       | 360   | 8.7 | 6.8 | 0.8 | 9.5  | 5.5    | 13.5 | 4.2%  | (1.8%) | 10.6% |

**Note:** Peak time shows as a continuous variable from 0-12, where 0 indicates the start and 12 as the end of a calendar year.

**Table S7. Example least-cost diets in Tanzania, Malawi and Ethiopia, by month (g/day)**

| <b>Tanzania (Kigoma, 2015)</b>                 |     |     |     |     |     |     |     |     |     |     |     |     |
|------------------------------------------------|-----|-----|-----|-----|-----|-----|-----|-----|-----|-----|-----|-----|
|                                                | Jan | Feb | Mar | Apr | May | Jun | Jul | Aug | Sep | Oct | Nov | Dec |
| White Maize grains                             | 352 | 352 | 352 | 352 | 352 | 358 | 358 | 358 | 358 | 358 | 358 | 335 |
| Cassava flour                                  |     |     |     |     |     |     |     |     |     |     |     | 23  |
| Sweet Potatoes                                 | 59  | 59  | 59  | 59  | 59  | 64  | 64  | 64  | 64  | 64  | 64  | 69  |
| Soybeans                                       | 172 | 172 | 172 | 172 | 172 | 164 | 164 | 164 | 164 | 164 | 164 | 168 |
| Dried fish                                     | 17  | 17  | 17  | 17  | 17  | 17  | 17  | 17  | 17  | 17  | 17  | 17  |
| Green pepper                                   | 18  | 18  | 18  | 18  | 18  | 14  | 14  | 14  | 14  | 14  | 14  | 10  |
| Mchicha (amaranth leaves)                      |     |     |     |     |     | 19  | 19  | 19  | 19  | 19  | 19  |     |
| <b>Malawi (Kasungu, 2016)</b>                  |     |     |     |     |     |     |     |     |     |     |     |     |
|                                                | Jan | Feb | Mar | Apr | May | Jun | Jul | Aug | Sep | Oct | Nov | Dec |
| Maize grain                                    | 355 | 311 | 305 | 252 | 175 | 175 | 281 | 132 | 334 | 299 | 334 | 272 |
| White bread                                    | 104 | 78  | 92  | 188 | 143 | 143 |     | 249 | 57  | 68  | 57  | 192 |
| Sweet potatoes                                 |     |     |     | 69  | 2   | 2   |     |     | 51  | 67  | 51  |     |
| Brown beans                                    |     |     |     |     |     |     | 30  |     |     |     |     |     |
| Cowpeas                                        | 24  | 16  | 13  |     |     |     |     |     |     |     |     |     |
| Groundnuts                                     |     |     |     |     |     |     |     |     | 114 | 130 | 114 |     |
| Chicken eggs                                   |     | 232 | 225 |     |     |     | 356 | 405 |     |     |     |     |
| Powdered milk                                  |     |     |     |     | 164 | 164 | 58  | 61  |     |     |     |     |
| Beef                                           | 75  |     |     | 75  |     |     |     |     |     |     |     |     |
| Sardine                                        |     |     |     |     |     |     |     |     | 10  | 10  | 10  | 10  |
| Mangoes                                        |     |     |     |     | 116 | 116 |     |     |     |     |     |     |
| Pumpkin                                        | 116 |     | 31  |     |     |     |     |     |     |     |     | 112 |
| Rape leaves                                    |     | 85  |     |     |     |     |     |     | 84  | 3   | 84  |     |
| Avocado                                        |     |     |     |     | 35  | 35  |     |     |     |     |     |     |
| Cabbage                                        |     |     |     | 159 |     |     |     |     |     |     |     | 136 |
| Guava                                          | 22  |     | 25  |     |     |     | 23  | 24  |     | 25  |     |     |
| Cooking oil                                    | 25  | 43  | 44  | 21  | 21  | 21  | 19  | 15  |     |     |     | 63  |
| Cooking oil, refill                            |     |     |     | 27  |     |     |     |     |     |     |     |     |
| <b>Ethiopia (Mecha, West Gojam Zone, 2016)</b> |     |     |     |     |     |     |     |     |     |     |     |     |
|                                                | Jan | Feb | Mar | Apr | May | Jun | Jul | Aug | Sep | Oct | Nov | Dec |
| Maize (white)                                  | 244 | 254 | 292 | 279 | 269 | 309 | 176 | 175 | 326 | 175 | 185 | 295 |
| Wheat white                                    |     |     |     |     |     |     | 172 | 141 |     | 135 | 67  |     |
| African millet                                 | 32  | 50  | 43  | 29  | 48  | 39  |     | 37  | 21  | 40  | 47  | 28  |
| Sweet potato                                   |     |     |     | 16  |     |     |     |     |     |     |     |     |
| Chick peas                                     | 25  | 14  |     | 15  | 10  |     |     |     |     |     |     | 21  |
| Horse beans                                    | 21  | 13  |     |     | 6   |     |     |     |     |     |     |     |
| Lima beans                                     |     |     |     |     |     | 47  |     |     |     |     | 41  |     |
| Ground nut shelled                             |     |     |     | 36  |     |     |     |     |     |     |     |     |
| Cow milk (unpasteurized)                       | 444 | 444 | 444 | 444 | 444 | 444 | 444 | 444 | 444 | 444 | 444 | 444 |
| Sunflower seeds                                |     |     |     |     |     | 18  |     |     |     |     |     |     |
| Ethiopian kale                                 | 35  | 2   |     | 12  |     | 30  | 54  |     | 7   | 4   | 17  | 7   |
| Pumpkin                                        | 421 | 320 | 197 | 807 | 271 | 279 |     |     | 692 | 47  | 238 | 774 |
| Spinach                                        |     | 58  | 137 |     | 90  | 14  | 132 | 146 | 96  | 123 | 38  | 30  |
| Cooking oil (imported)                         | 44  | 44  | 43  |     | 43  | 11  | 46  | 46  | 15  | 46  | 47  | 17  |

Note: The study as a whole uses a total of 25,522 least-cost diets, drawing from a potential list of 71, 55 and 97 distinct food items in Tanzania, Malawi and Ethiopia respectively. To illustrate the composition of an individual diet, and the degree of substitution among items and between food groups over the course of a year, we selected the one market location with the lowest average CoNA in each country, and show the composition of its least-cost diets each month over the most recent calendar year for which prices were available. This reveals which specific food items are selected each month at comparable locations in the three countries, in terms of grams per day. Of the three locations shown, the simplest example is from Tanzania, where people in the lowest-cost district (Kigoma) can meet their requirements most affordably by including 19 g/day of a green leafy vegetable (mchicha) during the June -November period, with a corresponding reduction in the need for green pepper and soybean.
